# Supplementary material for: Control of Photoluminescence of Carbon Nanodots via Surface Functionalization using Para-substituted Anilines
Source: PubMed Central journal article supplement (PMC4517466; doi:10.1038/srep12604), 2015-07-28
Supplement: srep12604-s1.pdf [file srep12604-s1.pdf]

# Supplementary Information for Control of Photoluminescence of Carbon Nanodots via Surface Functionalization using Para-substituted Anilines

Woosung Kwon<sup>1</sup>, Sungan Do<sup>1</sup>, Ji-Hee Kim<sup>2</sup>, Mun Seok Jeong<sup>2,3,\*</sup> and Shi-Woo Rhee<sup>1,\*</sup>

<sup>1</sup>Department of Chemical Engineering, Pohang University of Science and Technology (POSTECH), 77 Cheongam-ro, Nam-gu, Pohang 790-784, South Korea.

<sup>2</sup>Center for Integrated Nanostructure Physics, Institute for Basic Science (IBS), 2066 Seobu-ro, Jangan-gu, Sungkyunkwan University, Suwon 440-746, South Korea.

<sup>3</sup>Department of Energy Science, Sungkyunkwan University, 2066 Seobu-ro, Jangan-gu, Suwon 440-746, South Korea.

## Corresponding author footnote

\*Corresponding author.

Tel: +82-31-299-4053; Fax: +82-31-299-6505; E-mail: [mjeong@skku.edu](mailto:mjeong@skku.edu) (M.S.J.)

Tel: +82-54-279-2265; Fax: +82-54-279-8619; E-mail: [srhee@postech.ac.kr](mailto:srhee@postech.ac.kr) (S-.W.R.)

## Contents

|                                      |     |
|--------------------------------------|-----|
| Methods for sample preparation ..... | S1  |
| Figure S1 .....                      | S3  |
| Figure S2 .....                      | S4  |
| Figure S3 .....                      | S5  |
| Figure S4 .....                      | S6  |
| Figure S5 .....                      | S7  |
| Figure S6 .....                      | S8  |
| Figure S7 .....                      | S9  |
| Figure S8 .....                      | S10 |
| Figure S9 .....                      | S11 |
| Figure S10 .....                     | S12 |
| Figure S11 .....                     | S14 |
| Figure S12 .....                     | S16 |
| Figure S13 .....                     | S19 |
| Figure S14 .....                     | S20 |
| Figure S15 .....                     | S21 |
| Figure S16 .....                     | S22 |
| Figure S17 .....                     | S23 |
| Figure S18 .....                     | S24 |
| Figure S19 .....                     | S29 |
| Figure S20 .....                     | S30 |
| Figure S21 .....                     | S31 |
| Figure S22 .....                     | S32 |

|                 |     |
|-----------------|-----|
| Figure S23..... | S33 |
| Figure S24..... | S34 |
| Figure S25..... | S35 |
| Figure S26..... | S36 |
| Figure S27..... | S37 |
| Figure S28..... | S38 |
| Table S1 .....  | S6  |
| Table S2 .....  | S13 |
| Table S3 .....  | S18 |
| Table S4 .....  | S22 |
| Table S5 .....  | S23 |
| Table S6 .....  | S24 |

## **Methods for sample preparation**

**Materials.** All reagents were purchased from commercial sources and used without further purification. Citric acid (99.5%), 1-octadecene (95%), toluene (anhydrous, 99.5%) and 4-methoxyaniline (99%) were purchased from Sigma-Aldrich. Oleylamine (90%) was purchased from Acros Organics. 4-(methylthio)aniline (98%) was purchased from TCI. 4-(dimethylamino)aniline (96%) was purchased from Alfa Aesar. Poly(methyl methacrylate) (10% in anisole; molecular weight = 950,000) was purchased from Microchem. Deuterated chloroform (99.96%) was purchased from Cambridge Isotope Laboratories. Silicon wafers (150 mm in diameter) were purchased from Siltron Inc. and cut into 10 mm × 10 mm pieces by means of a diamond cutter. Gold wires (99.99% purity) were purchased from Koralco. A gold film (50 nm) was deposited onto silicon wafers by using thermal evaporator to give gold-coated silicon substrates. Water refers to deionized water.

**TEM.** C-dots (1 mg) were dissolved in hexane (1 ml). The solution (10  $\mu$ l) was dropped onto a CF300-Cu TEM grid (Electron Microscopy Sciences) and dried for 12 h at 80 °C under vacuum.

**Raman spectroscopy.** C-dots (10 mg) were dissolved in toluene (1 ml). An aliquot of the solution (100  $\mu$ l) was spin-cast on gold-coated silicon substrates and dried for 12 h under ambient conditions.

**X-ray photoelectron spectroscopy.** C-dots (10 mg) were dissolved in toluene (1 ml). An aliquot of the solution (100  $\mu$ l) was spin-cast on gold-coated silicon substrates and dried for 12 h under ambient conditions.

**Nuclear magnetic resonance.** C-dots (100 mg) were dissolved in deuterated chloroform (1 ml). The solution was transferred into 600 MHz nuclear magnetic resonance sample tubes (Optima) and sealed by Teflon tapes.

**Infrared spectroscopy.** C-dots (100 mg) were dissolved in anhydrous toluene (1 ml). An aliquot of the solution (100  $\mu$ l) was dropped onto a KBr window (Pike Technologies), dried for 12 h under high-purity nitrogen flow and sandwiched with another KBr window. This pair of KBr windows with C-dots was mounted on a demountable cell.

**Kelvin probe force microscopy.** C-dots (10 mg) were dissolved in toluene (1 ml). An aliquot of the solution (100  $\mu$ l) was spin-cast on gold-coated silicon substrates and dried for 12 h under ambient conditions. The probe was calibrated by using a gold substrate.

**Electron energy loss spectroscopy.** C-dots (10 mg) were dissolved in toluene (1 ml). An aliquot of the solution (100  $\mu$ l) was spin-cast on gold-coated silicon substrates and dried for 12 h under ambient conditions.

**Ultraviolet photoelectron spectroscopy.** C-dots (10 mg) were dissolved in toluene (1 ml). An aliquot of the solution (100  $\mu$ l) was spin-cast on gold-coated silicon substrates and dried for 12 h under ambient conditions.

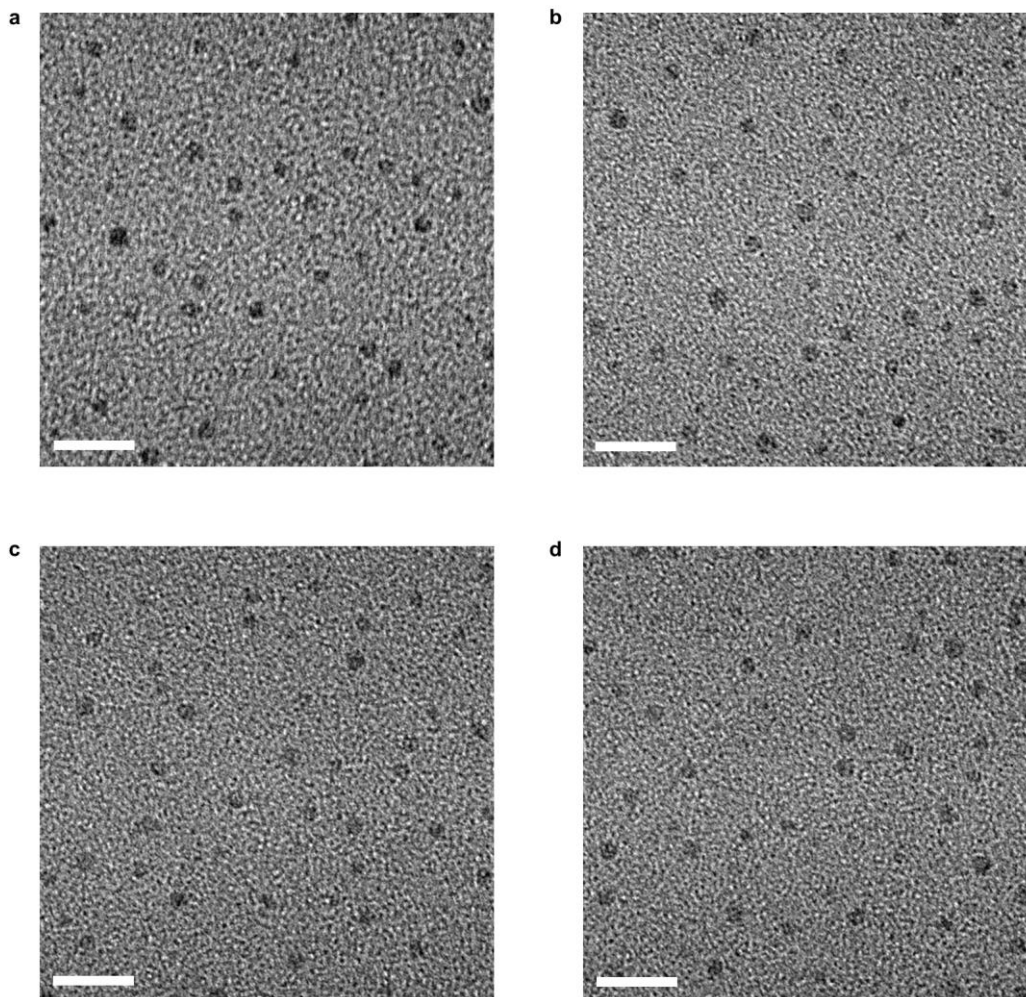

**Figure S1.** TEM images of **1** (a), **2** (b), **3** (c) and **4** (d). Scale bars, 10 nm.

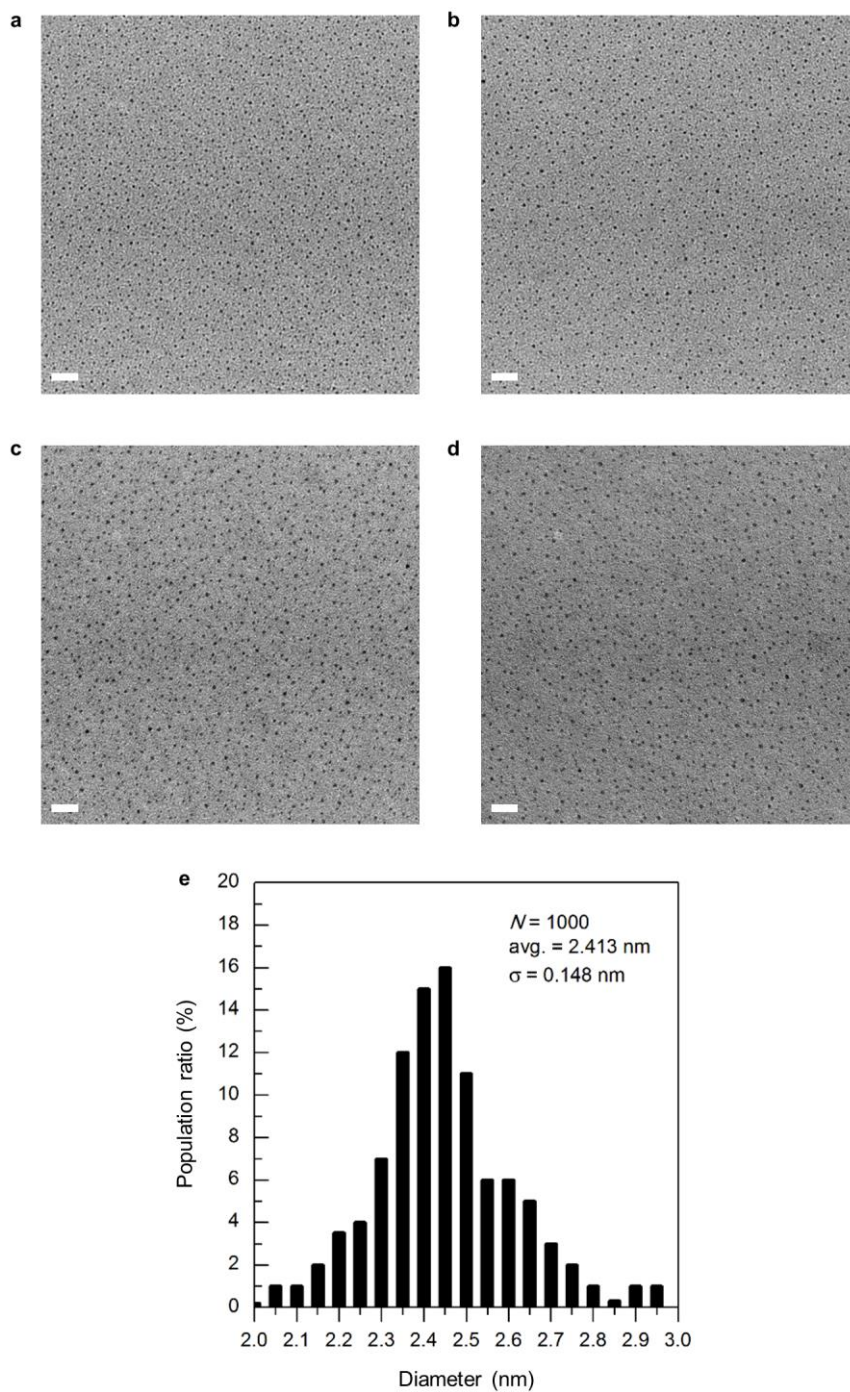

**Figure S2.** Low resolution TEM images of **1 (a)**, **2 (b)**, **3 (c)** and **4 (d)** for size statistics. Scale bars, 20 nm. **(e)** Size distribution of all samples. Population ratios below 0.5% are not shown.

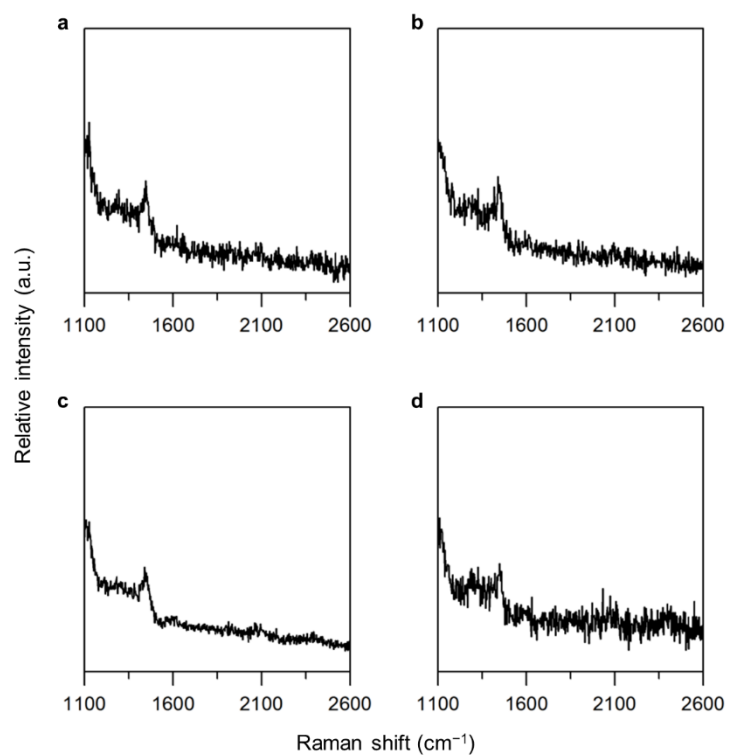

**Figure S3.** Raman spectra of **1** (a), **2** (b), **3** (c) and **4** (d).



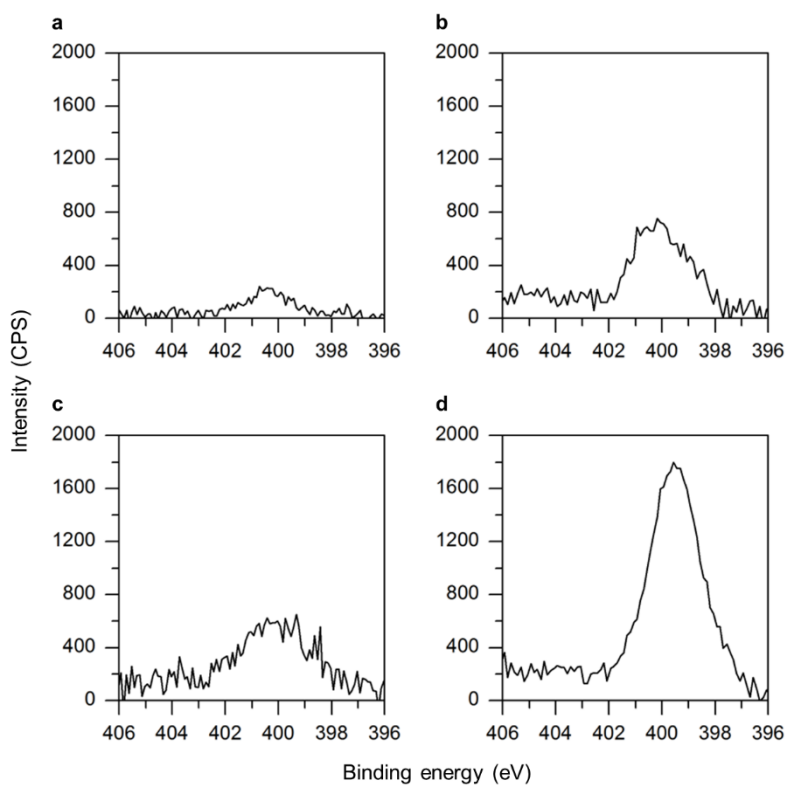

**Figure S4.** X-ray photoelectron spectra (N1s) of **1** (a), **2** (b), **3** (c) and **4** (d).

**Table S1.** Atomic ratios of C-dots.

| Sample   | Atomic ratio (%) |       |       |      |
|----------|------------------|-------|-------|------|
|          | C1s              | N1s   | O1s   | S2p  |
| <b>1</b> | 92               | 1.43  | 6.44  | ~0   |
| <b>2</b> | 77.91            | 6.82  | 14.30 | ~0   |
| <b>3</b> | 82.69            | 6.74  | 9.06  | 1.37 |
| <b>4</b> | 73.42            | 12.92 | 11.91 | ~0   |

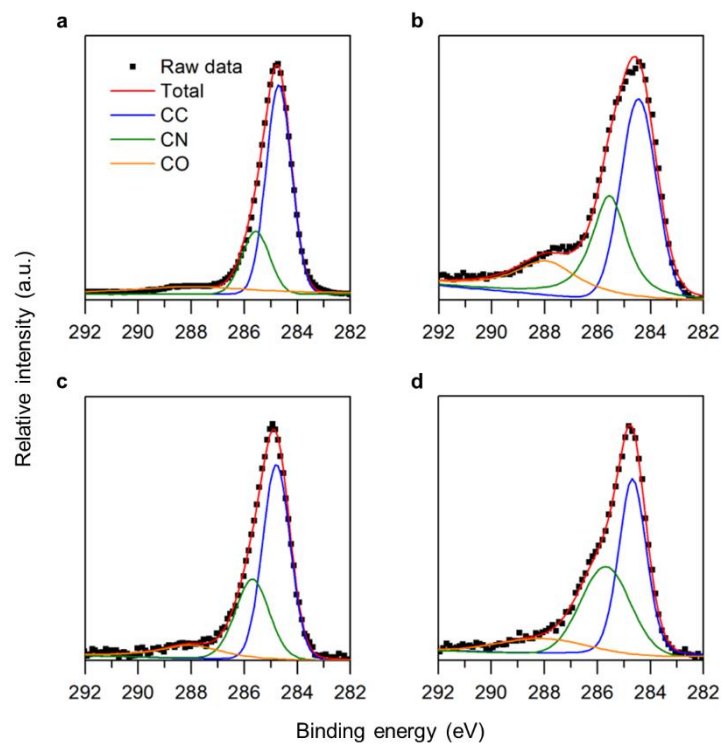

**Figure S5.** X-ray photoelectron spectra (C1s) of **1** (a), **2** (b), **3** (c) and **4** (d). Color coding represents chemical bondings and is the same for all graphs.

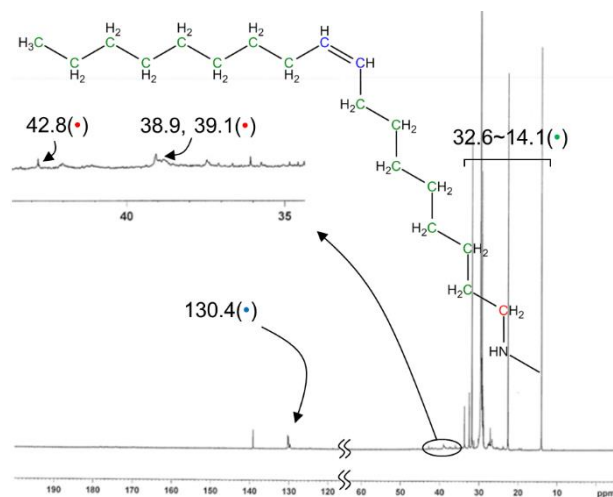

**Figure S6.** Nuclear magnetic resonance data of **1**. The inset shows the chemical structure of oleylamine. Color coding represents chemical bondings.

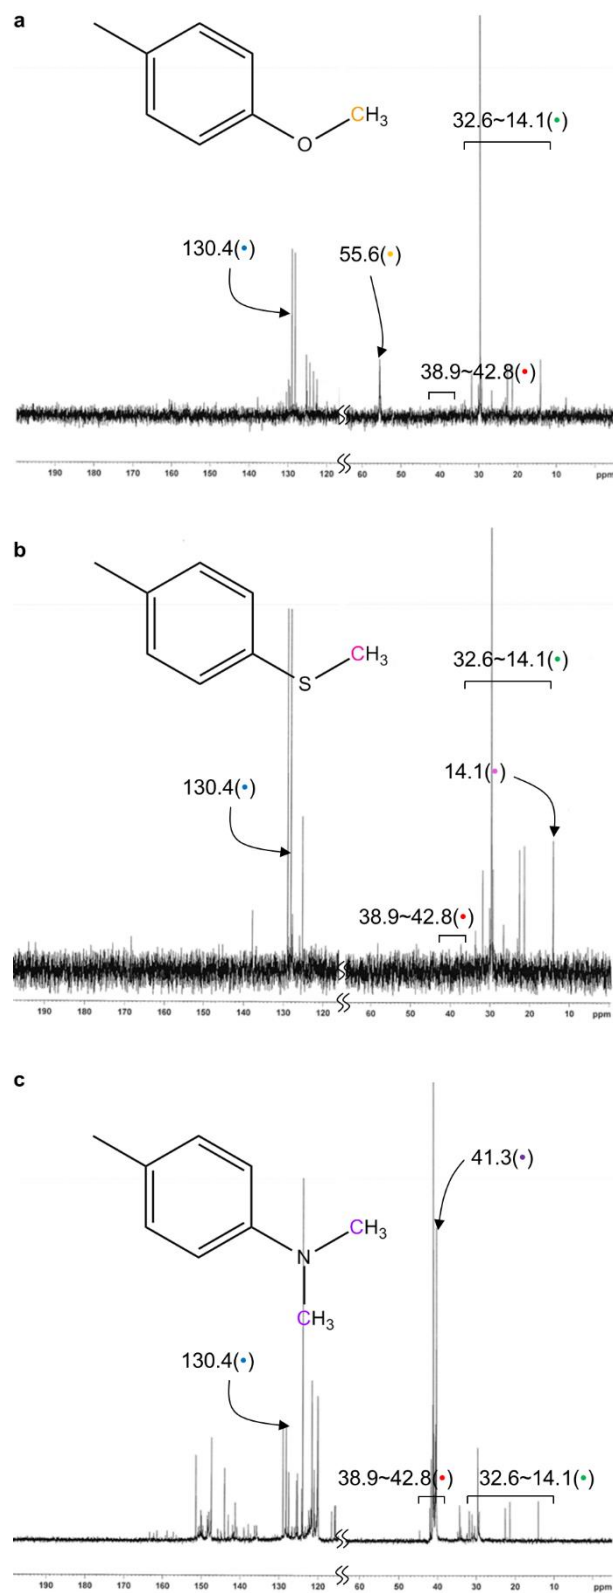

**Figure S7.** Nuclear magnetic resonance data of **2** (a), **3** (b) and **4** (c). The insets show the chemical structure of *para*-substituted anilines. Color coding represents chemical bondings.

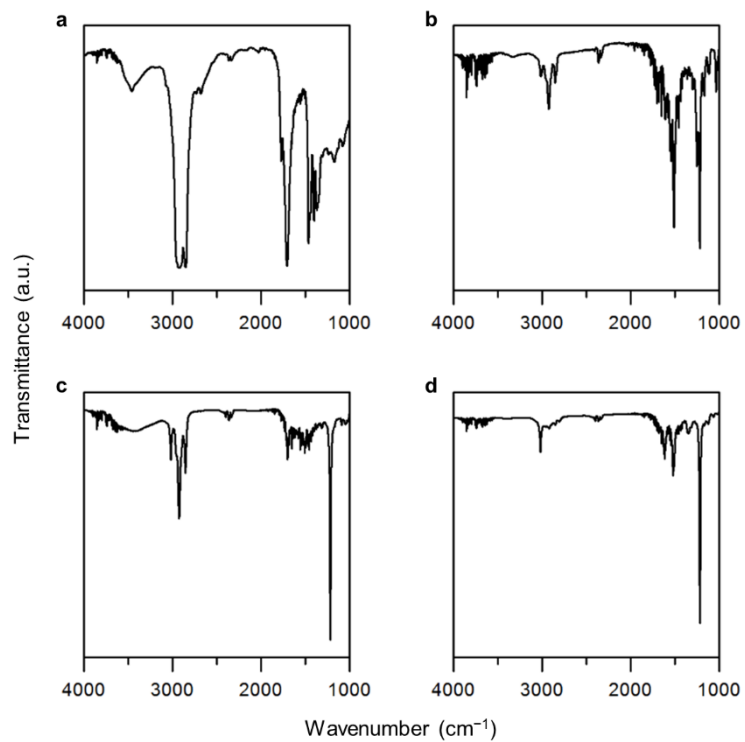

**Figure S8.** Infrared spectra of **1** (a), **2** (b), **3** (c) and **4** (d).

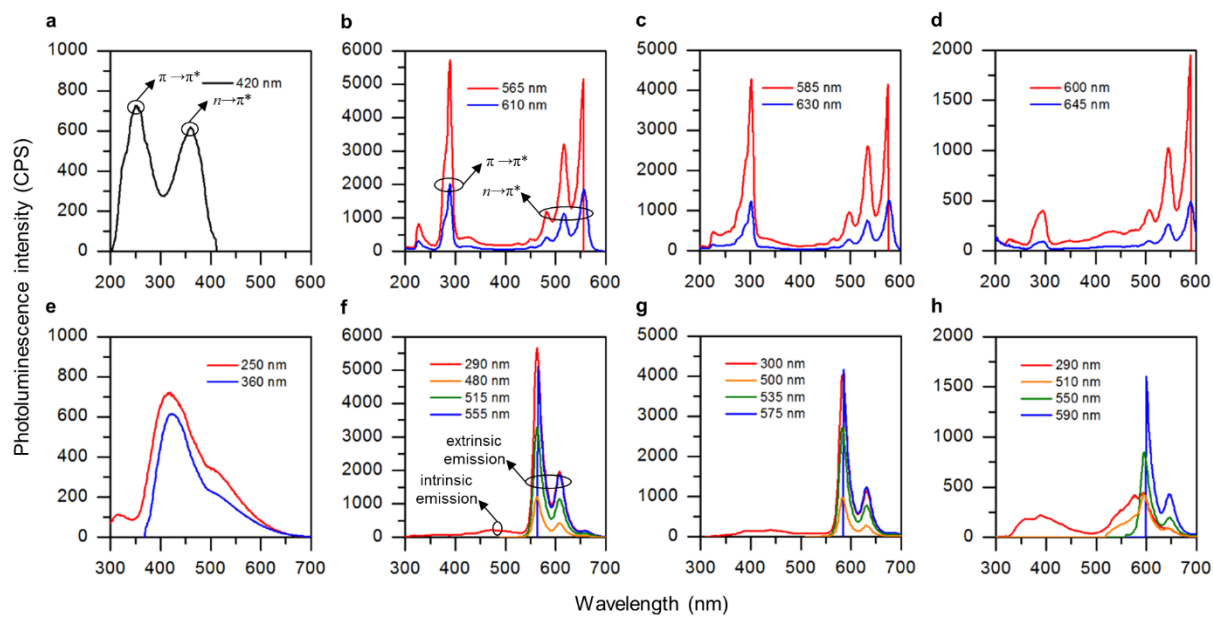

**Figure S9.** Photoluminescence (a–d) excitation and (e–h) emission spectra of **1** (a,e), **2** (b,f), **3** (c,g) and **4** (d,h). The legends in a–d and e–h show detection (emission) and excitation wavelengths, respectively.

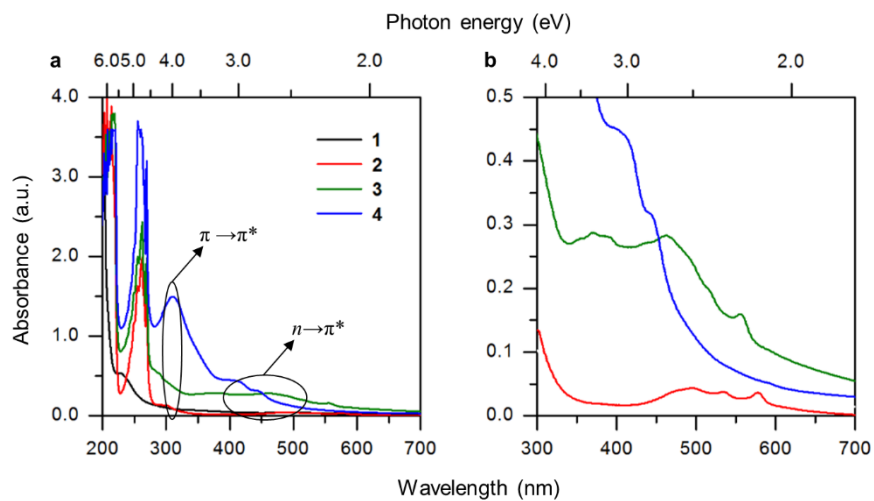

**Figure S10.** (a) Light absorption spectra of C-dots. The bands corresponding to  $\pi \rightarrow \pi^*$  and  $n \rightarrow \pi^*$  are indicated by solid circles. (b) The expansion of the bands corresponding to  $n \rightarrow \pi^*$ . Color coding is the same for all graphs.

**Table S2.** Energy levels of C-dots calculated by the Hückel method.

| Energy level      | Samples |        |        |        |
|-------------------|---------|--------|--------|--------|
|                   | 1       | 2      | 3      | 4      |
| LUMO+2            | -       | -3.071 | -3.080 | -1.064 |
| LUMO+1            | -       | -3.086 | -3.086 | -3.084 |
| LUMO <sup>a</sup> | -1.588  | -3.600 | -3.598 | -3.575 |
| HOMO <sup>b</sup> | -6.780  | -5.924 | -5.885 | -5.645 |
| HOMO-1            | -       | -7.583 | -7.576 | -7.546 |

<sup>a</sup>Lowest unoccupied molecular orbital

<sup>b</sup>Highest occupied molecular orbital



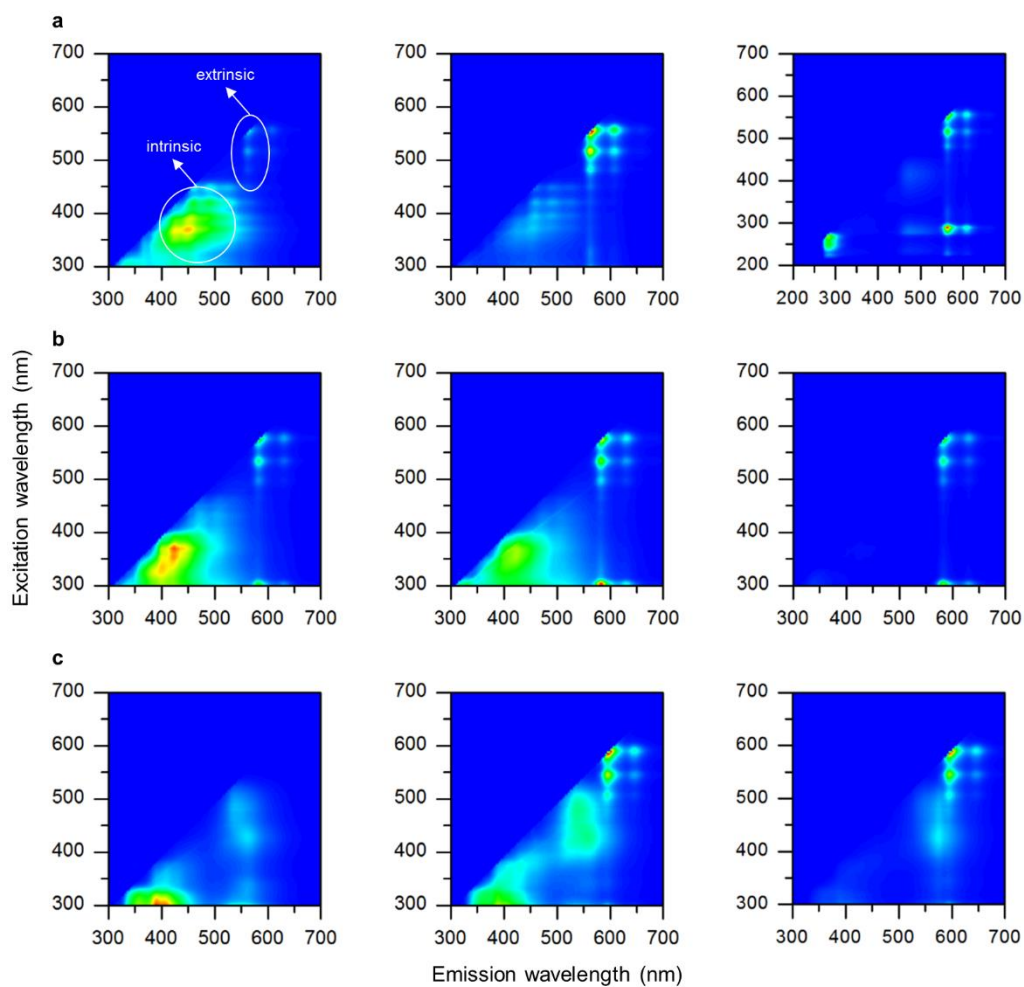

**Figure S11–1.** Emission maps of **2** (a), **3** (b) and **4** (c) as a function of the degree of surface functionalization (left column: low; middle column: medium; right column: high). The degree of surface functionalization was regulated by varying the concentration of *para*-substituted anilines. Intrinsic and extrinsic emissions were indicated by solid circles.

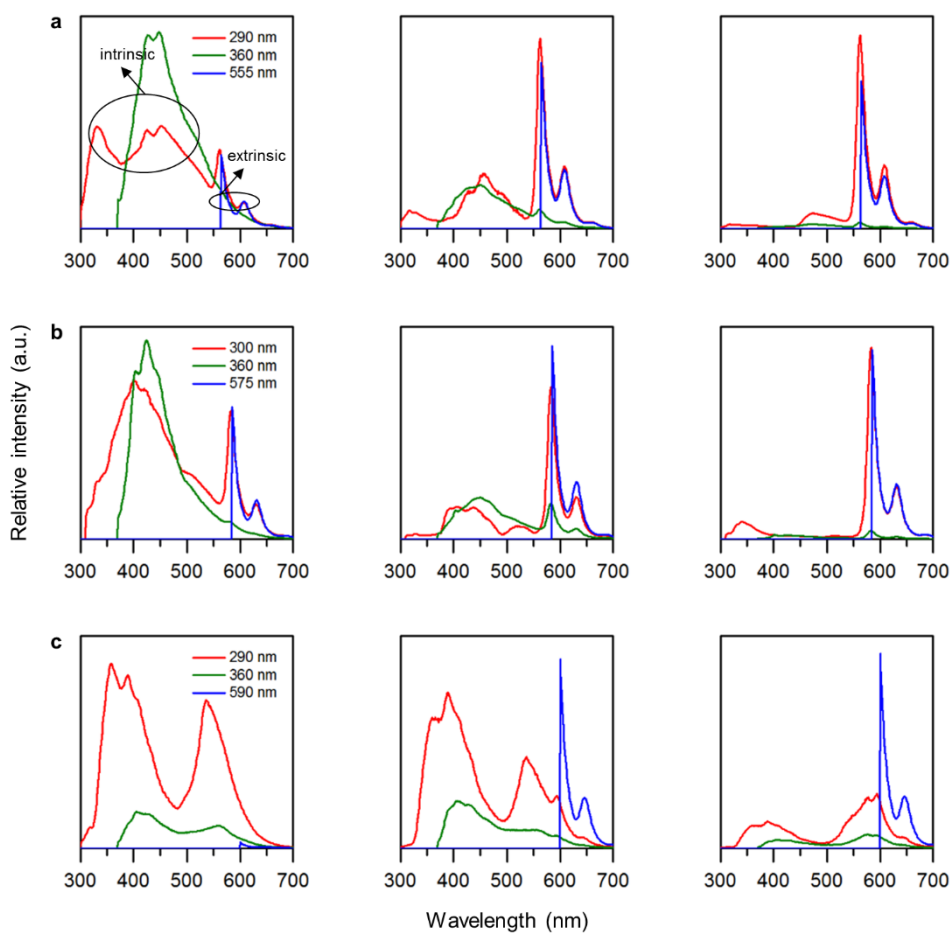

**Figure S11–2.** Emission spectra of **2** (a), **3** (b) and **4** (c) as a function of the degree of surface functionalization (left column: low; middle column: medium; right column: high). The legends show excitation wavelengths. Intrinsic and extrinsic emissions were indicated by solid circles.

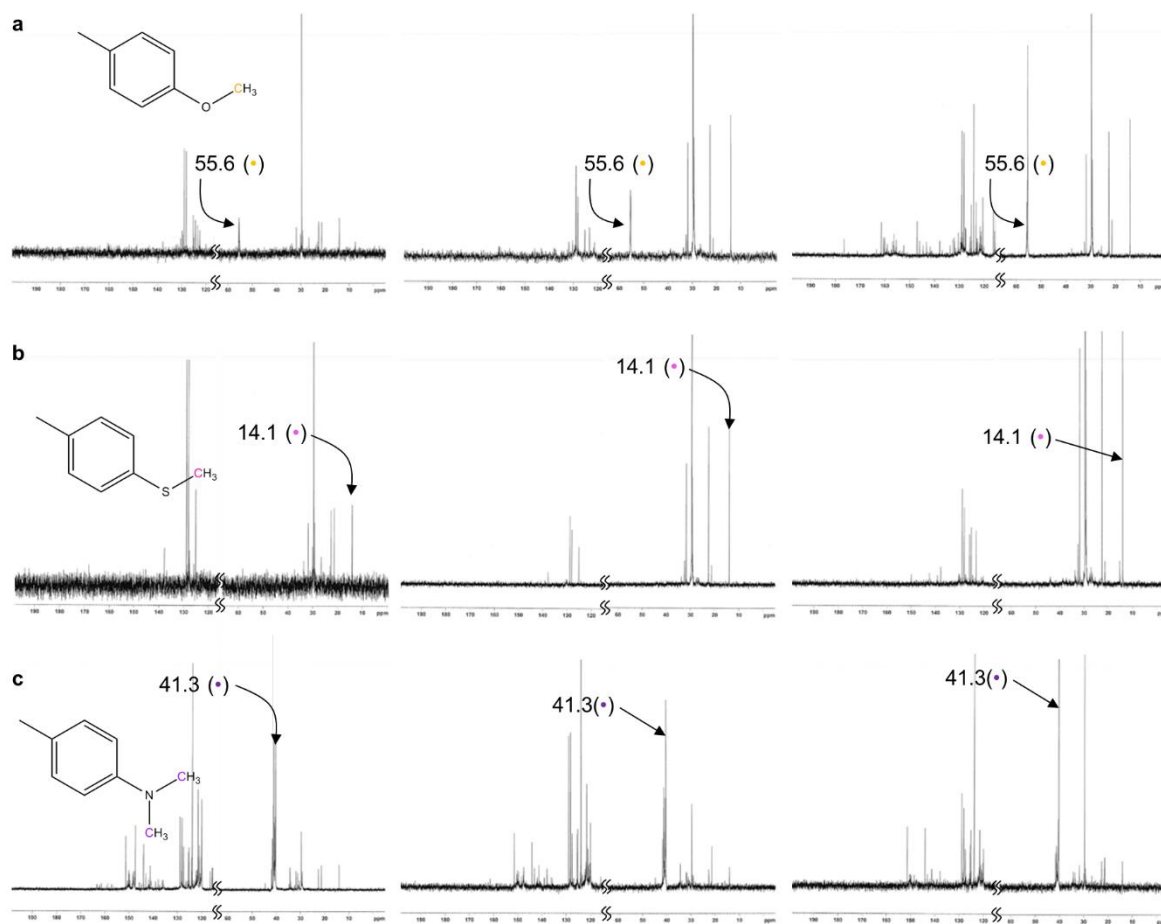

**Figure S12–1.** Nuclear magnetic resonance data of **2** (a), **3** (b) and **4** (c) as a function of the degree of surface functionalization (left column: low; middle column: medium; right column: high). The arrows indicate signals related with important chemical bondings to reflect the degree of surface functionalization.

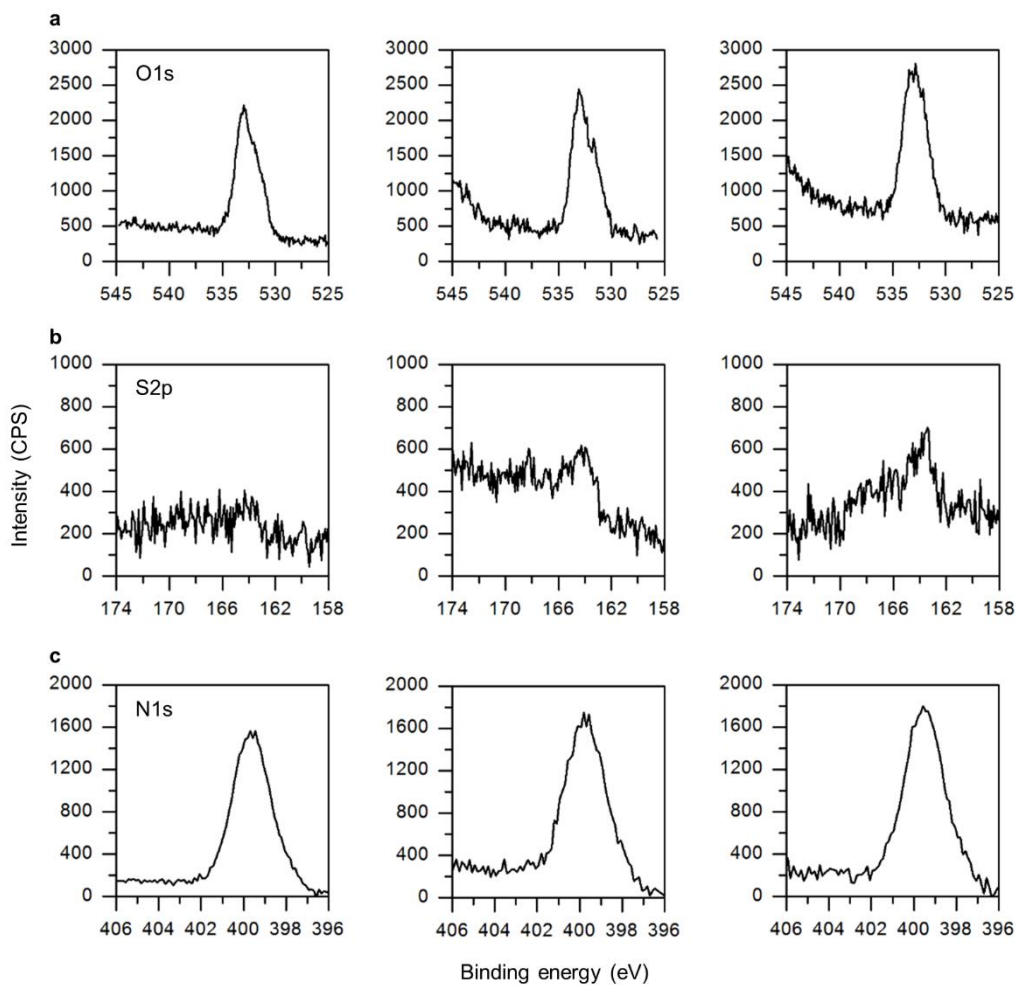

**Figure S12–2.** X-ray photoelectron spectra of **2** (a), **3** (b) and **4** (c) as a function of the degree of surface functionalization (left column: low; middle column: medium; right column: high). To determine the degree of surface functionalization, we traced the change in the number of the characteristic atoms of *para*-substituents (O, S and N for **2**, **3** and **4**, respectively).

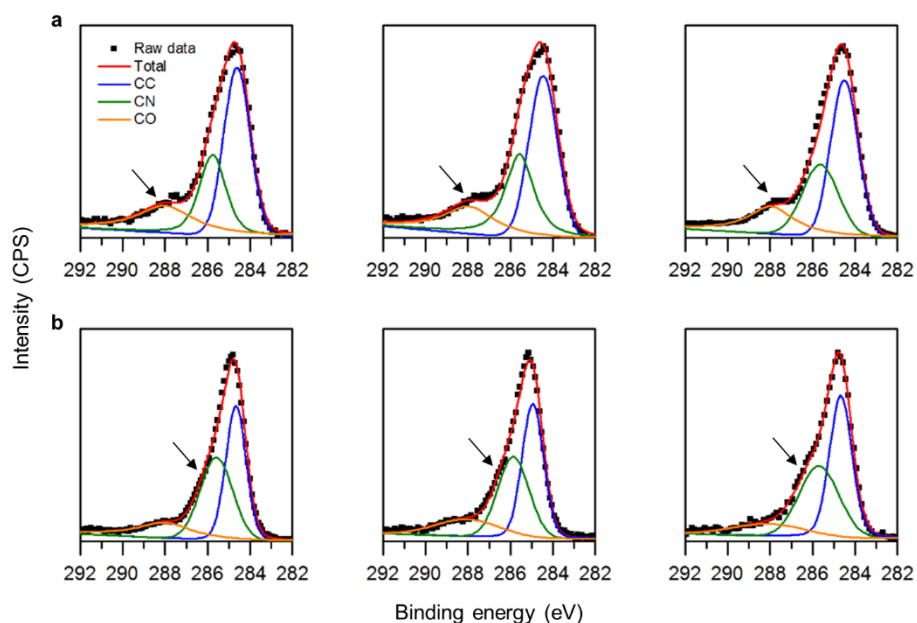

**Figure S12-3.** X-ray photoelectron spectra (C1s) of **2** (a) and **4** (b) as a function of the degree of surface functionalization (left column: low; middle column: medium; right column: high). The arrows indicate the increase in the number of CO and CN bondings in **2** and **4**, respectively, with the degree of surface functionalization.

**Table S3.** Atomic ratios of C-dots as a function of the degree of surface functionalization.

| Sample   | Degree | Atomic ratio (%) |       |       |      |
|----------|--------|------------------|-------|-------|------|
|          |        | C1s              | N1s   | O1s   | S2p  |
| <b>2</b> | Low    | 83.19            | 5.55  | 11.24 | ~0   |
|          | Medium | 80.41            | 5.66  | 13.67 | ~0   |
|          | High   | 77.91            | 6.82  | 14.30 | ~0   |
| <b>3</b> | Low    | 82.56            | 4.21  | 10.96 | 0.81 |
|          | Medium | 84.68            | 4.58  | 8.60  | 1.06 |
|          | High   | 82.69            | 6.74  | 9.06  | 1.37 |
| <b>4</b> | Low    | 75.10            | 12.67 | 11.94 | ~0   |
|          | Medium | 73.42            | 12.92 | 11.91 | ~0   |
|          | High   | 71.66            | 14.54 | 13.56 | ~0   |

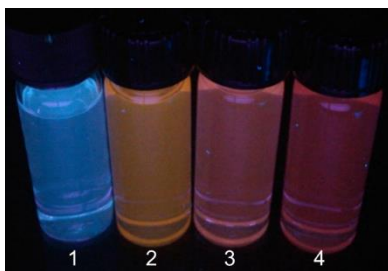

**Figure S13.** Photo of C-dots dissolved in hexane under 360 nm UV irradiation.

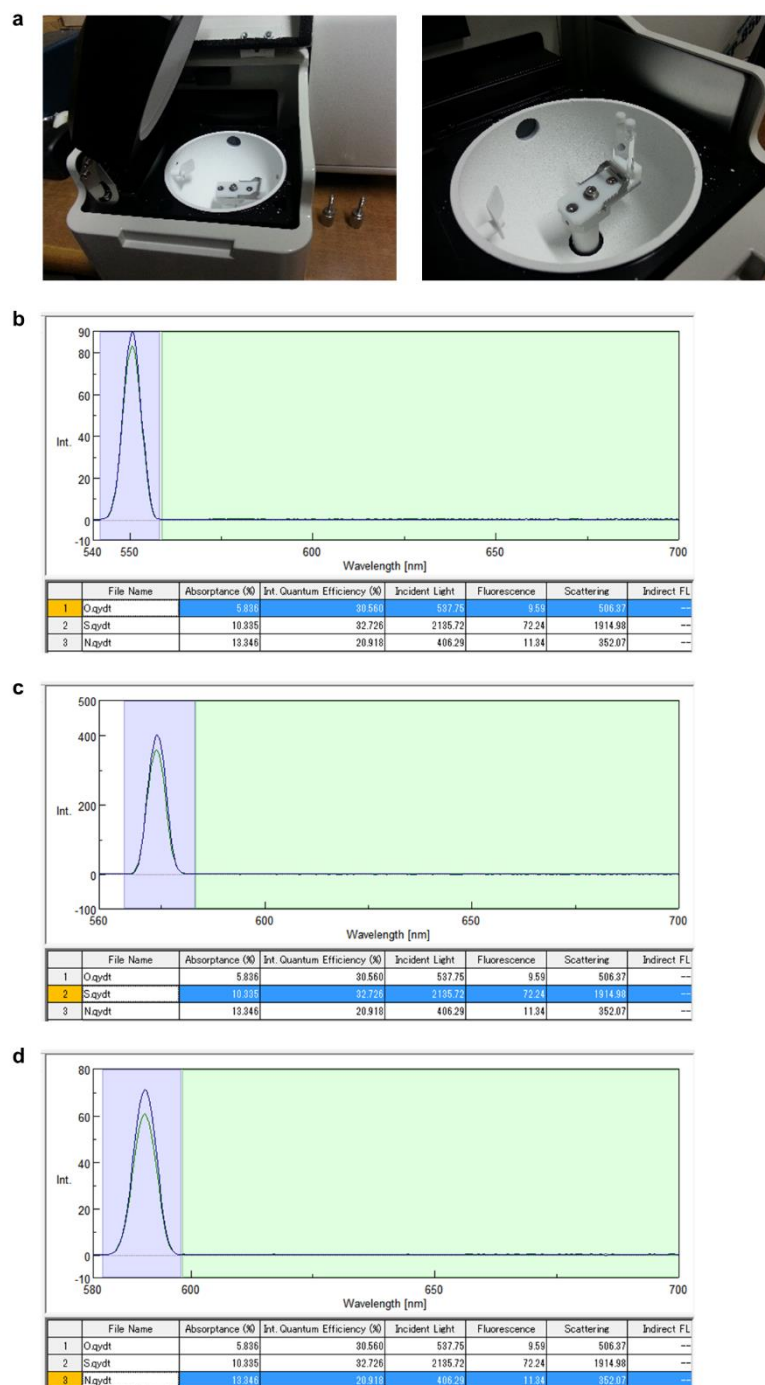

**Figure S14.** (a) Photo of integrating sphere setup. (b–d) Quantum yield calculation of **2** (b), **3** (c) and **4** (d) by using Jasco Spectra Manager II Software.

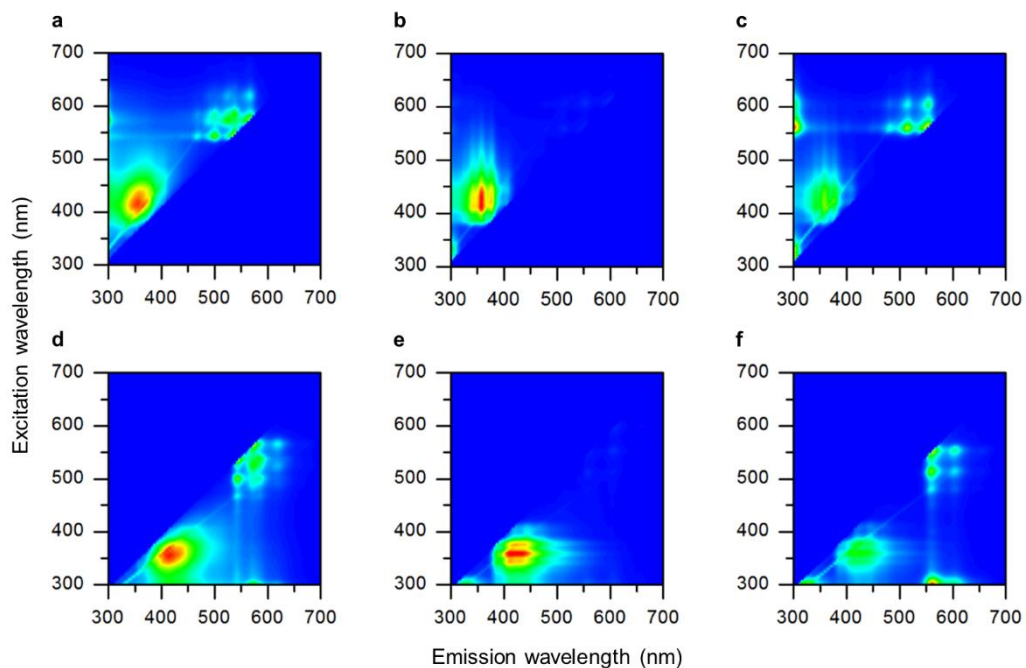

**Figure S15.** (a–c) Excitation and (d–f) emission maps of C-dots functionalized with 4-fluoroaniline (a,d), 4-chloroaniline (b,e) and 4-bromoaniline (c,f). The halogenated anilines were introduced under the same conditions as for 2–4. The photoluminescence intensity of C-dots with the halogenated anilines was less than one-tenth of that of 2–4.



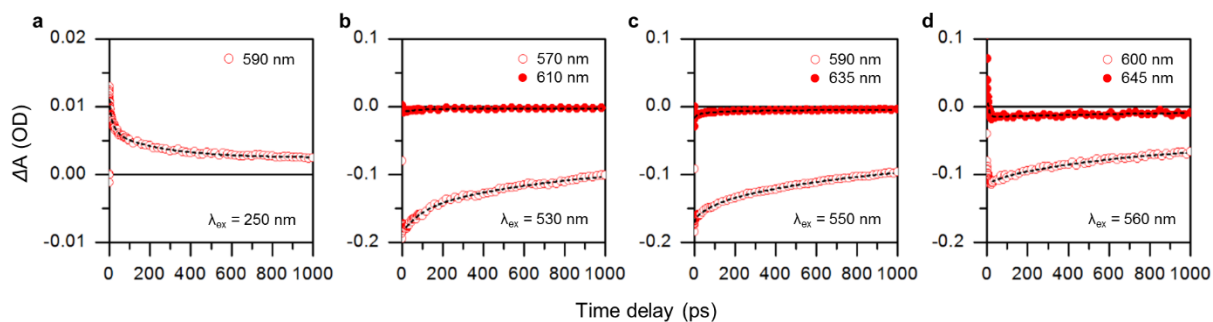

**Figure S16.** Time-domain TA spectra of **1** (a), **2** (b), **3** (c) and **4** (d) at different excitation wavelengths ( $\lambda_{\text{ex}}$ ). The data were fitted to bi-exponential functions to calculate decay times (dotted lines). The legends show the wavelengths of probe light.

**Table S4.** Decay times of photoexcited electrons in C-dots.

| Sample   | $\lambda_{\text{probe}}$ (nm) | $\tau_1$ (ps) | $\tau_2$ (ps) |
|----------|-------------------------------|---------------|---------------|
| <b>1</b> | 590                           | 29.27         | 303.30        |
| <b>2</b> | 570                           | 93.68         | 1010.00       |
|          | 610                           | 83.75         | 882.90        |
| <b>3</b> | 590                           | 98.36         | 1332.00       |
|          | 635                           | 49.12         | 850.90        |
| <b>4</b> | 600                           | 93.88         | 950.80        |
|          | 645                           | 72.65         | 767.20        |

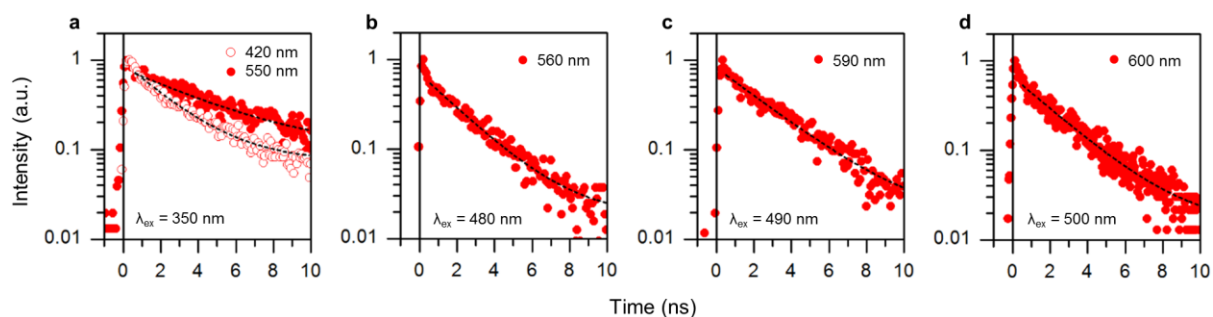

**Figure S17.** TRPL spectra of **1** (a), **2** (b), **3** (c) and **4** (d) at excitation wavelengths ( $\lambda_{\text{ex}}$ ) of 350, 480, 490, and 500 nm, respectively. The data were fitted to single exponential functions to calculate photoluminescence lifetimes (dotted lines). The legends show the wavelengths of probe light.

**Table S5.** Photoluminescence lifetimes of C-dots.

| Sample   | $\lambda_{\text{probe}}$ (nm) | $\tau$ (ns) |
|----------|-------------------------------|-------------|
| <b>1</b> | 420                           | 2.29        |
|          | 550                           | 4.29        |
| <b>2</b> | 560                           | 2.18        |
| <b>3</b> | 590                           | 2.73        |
| <b>4</b> | 600                           | 2.38        |

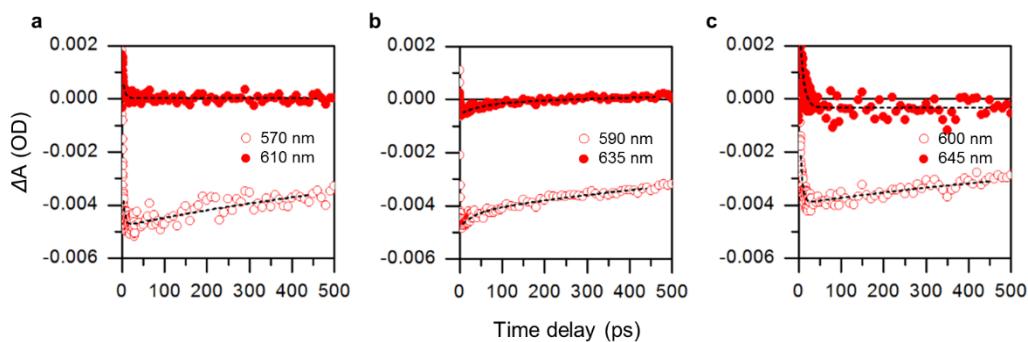

**Figure S18.** Time-domain TA spectra of **2** (a), **3** (b) and **4** (c) at the excitation wavelength of 300 nm. The data were fitted to bi-exponential functions to calculate decay times (dotted lines). The texts represent the wavelengths of probe light.

**Table S6.** Decay times of 300 nm photoexcited electrons in C-dots.

| Sample   | $\lambda_{\text{probe}}$ (nm) | $\tau_1$ (ps) | $\tau_2$ (ps) |
|----------|-------------------------------|---------------|---------------|
| <b>2</b> | 570                           | 4.26          | 899.2         |
|          | 610                           | 5.34          | -             |
| <b>3</b> | 590                           | 3.22          | 824.1         |
|          | 635                           | 5.39          | 859.1         |
| <b>4</b> | 600                           | 4.97          | 972.6         |
|          | 645                           | 8.44          | -             |

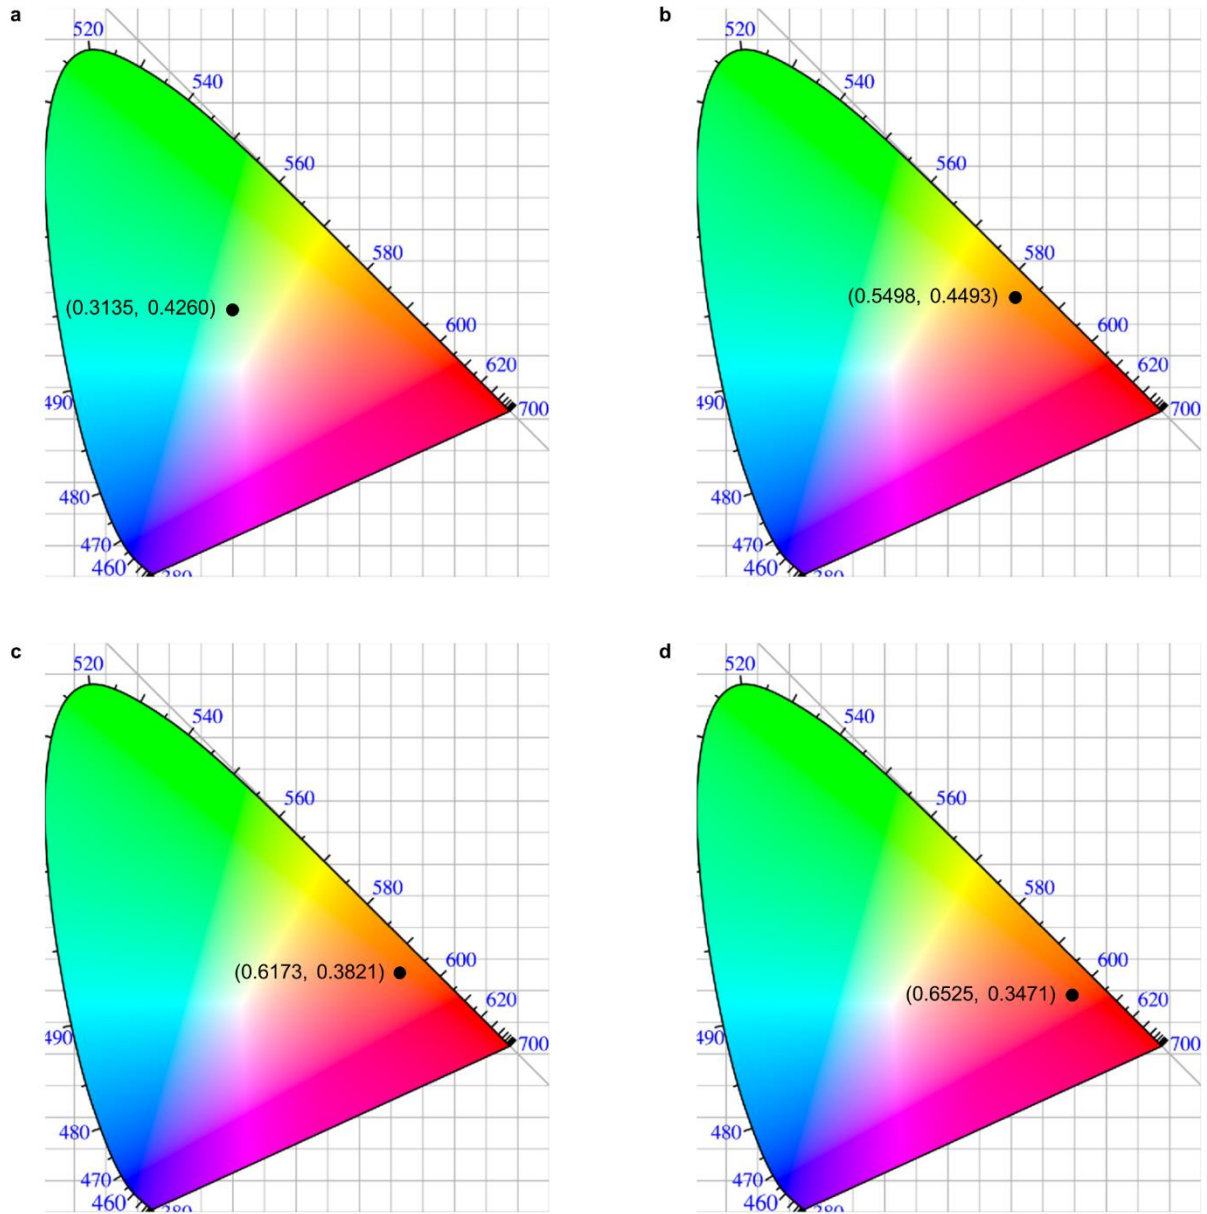

**Figure S19-1.** CIE chromaticity coordinates of LEDs with **f1** (a), **f2** (a), **f3** (c) and **f4** (d), calculated by using Chromaticity Coordinate Calculator (developed by Prashant Patil).

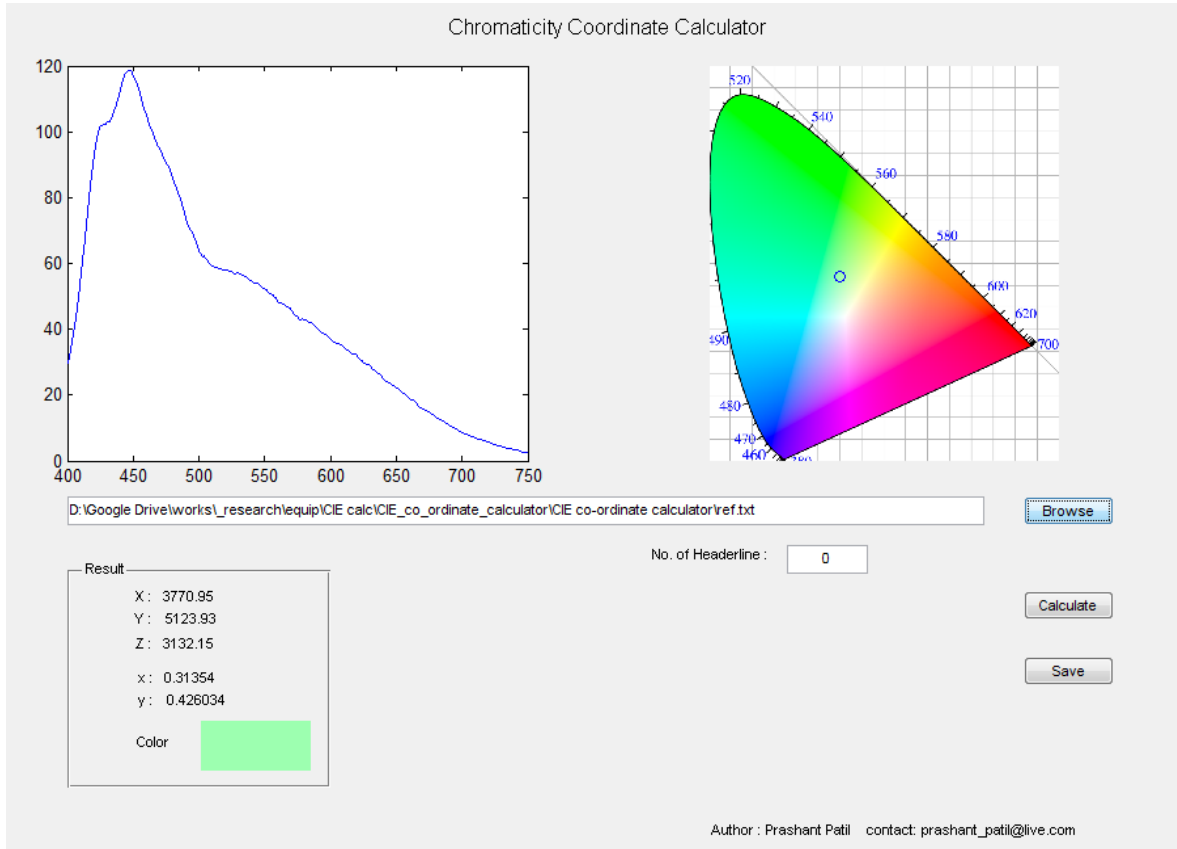

**Figure S19–2** Calculation of CIE chromaticity coordinates of LEDs with **f1**.

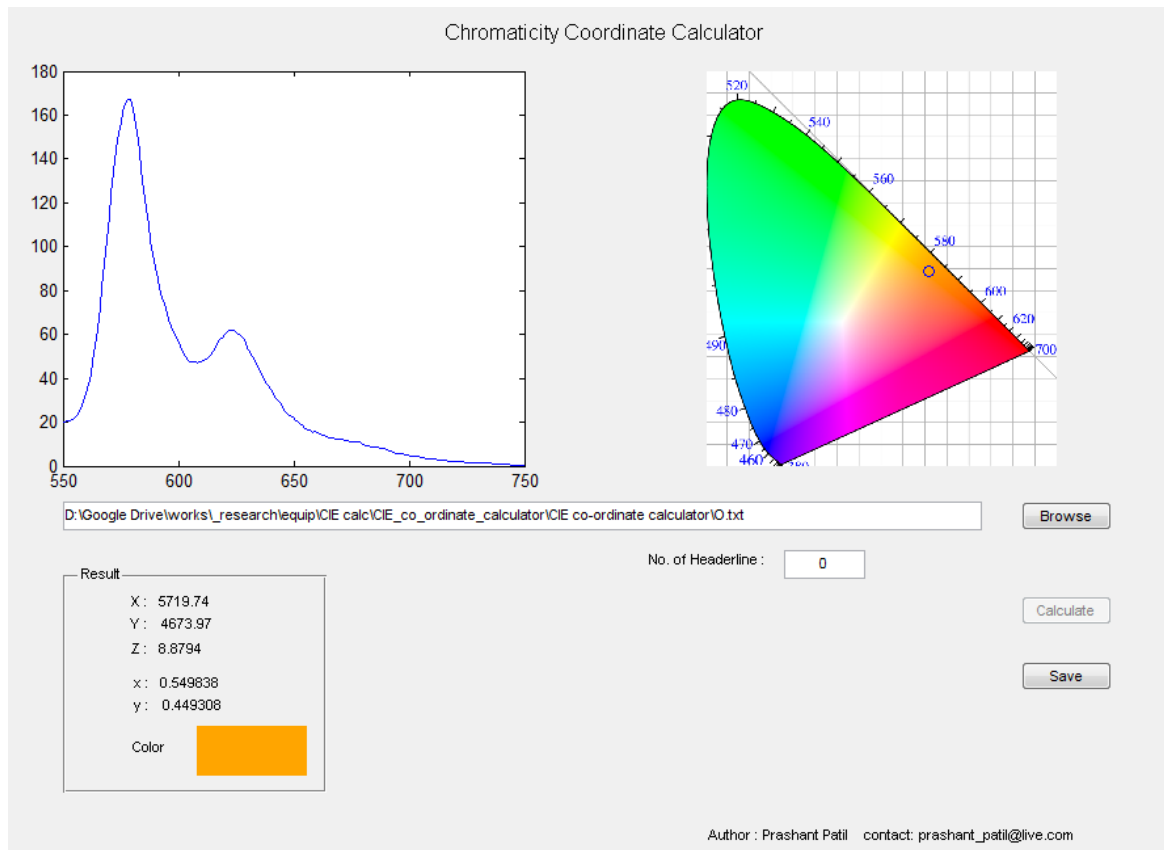

**Figure S19–3** Calculation of CIE chromaticity coordinates of LEDs with f2.

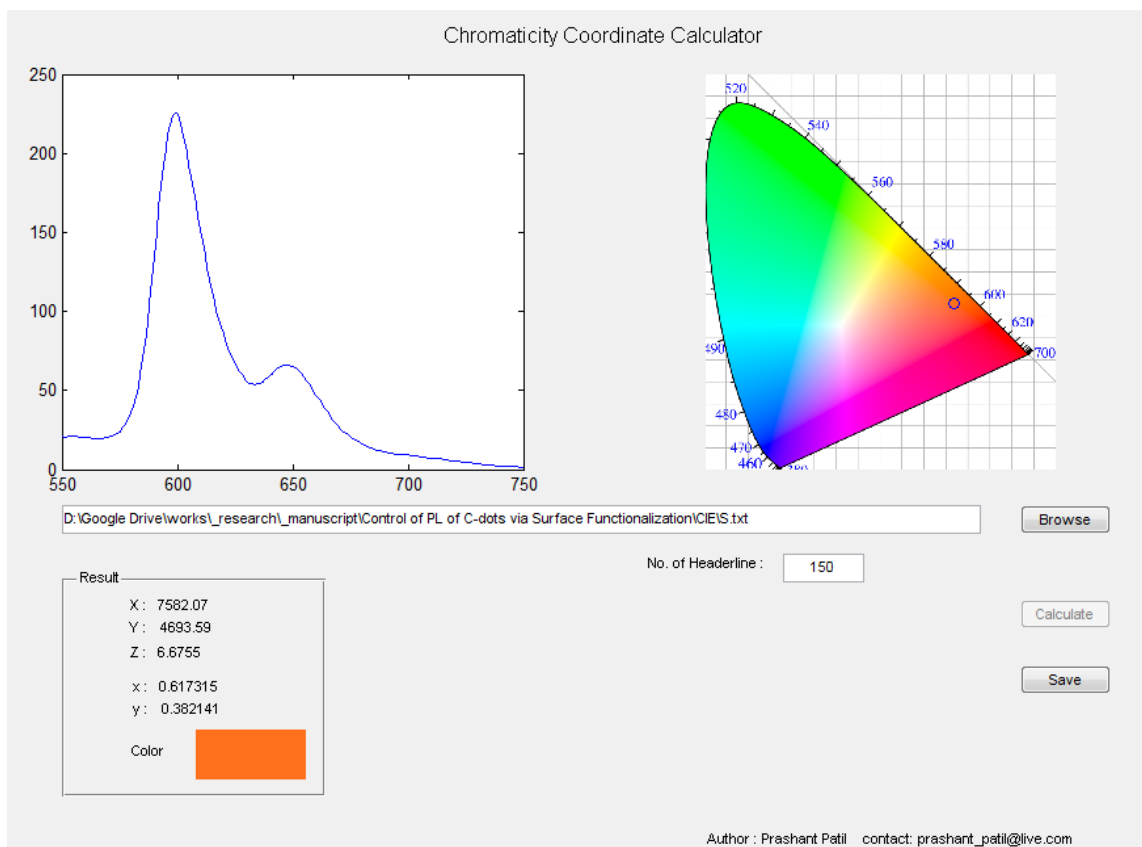

**Figure S19–4** Calculation of CIE chromaticity coordinates of LEDs with **f3**.

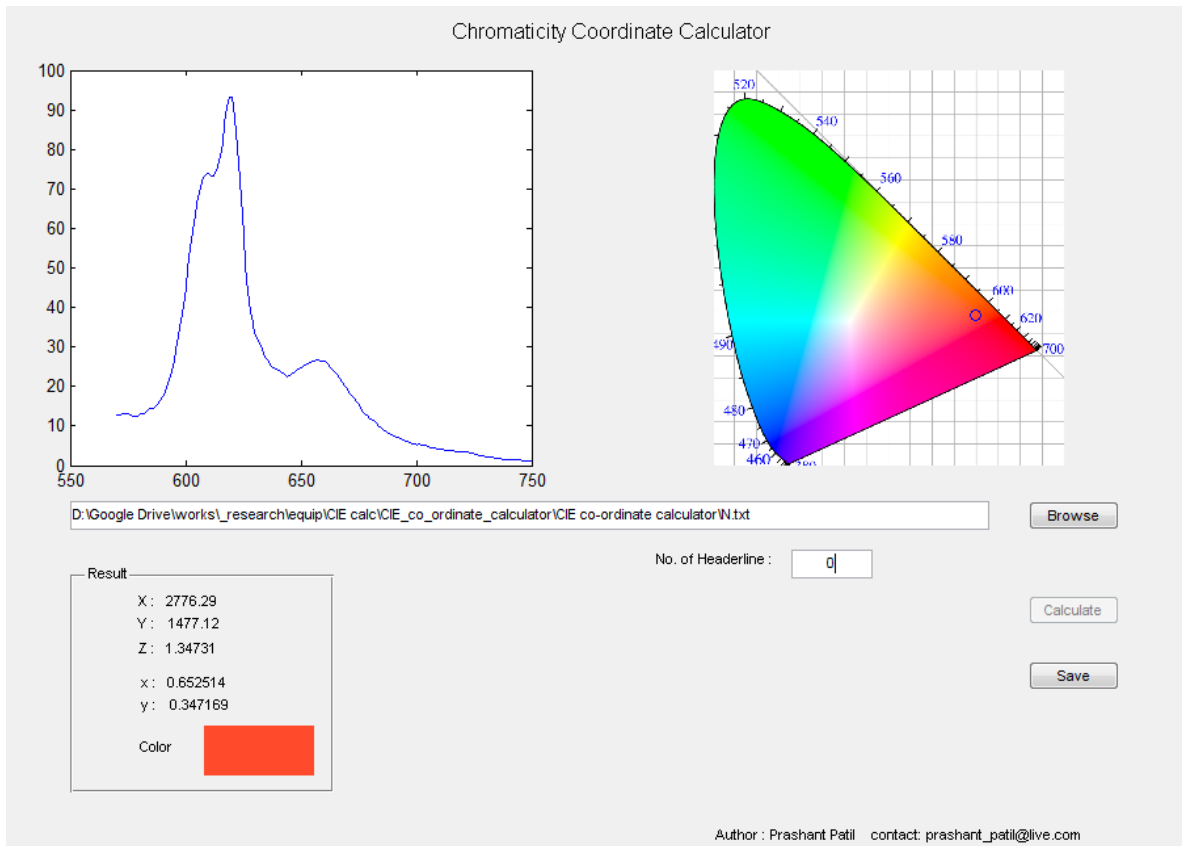

**Figure S19–5.** Calculation of CIE chromaticity coordinates of LEDs with **f4**.



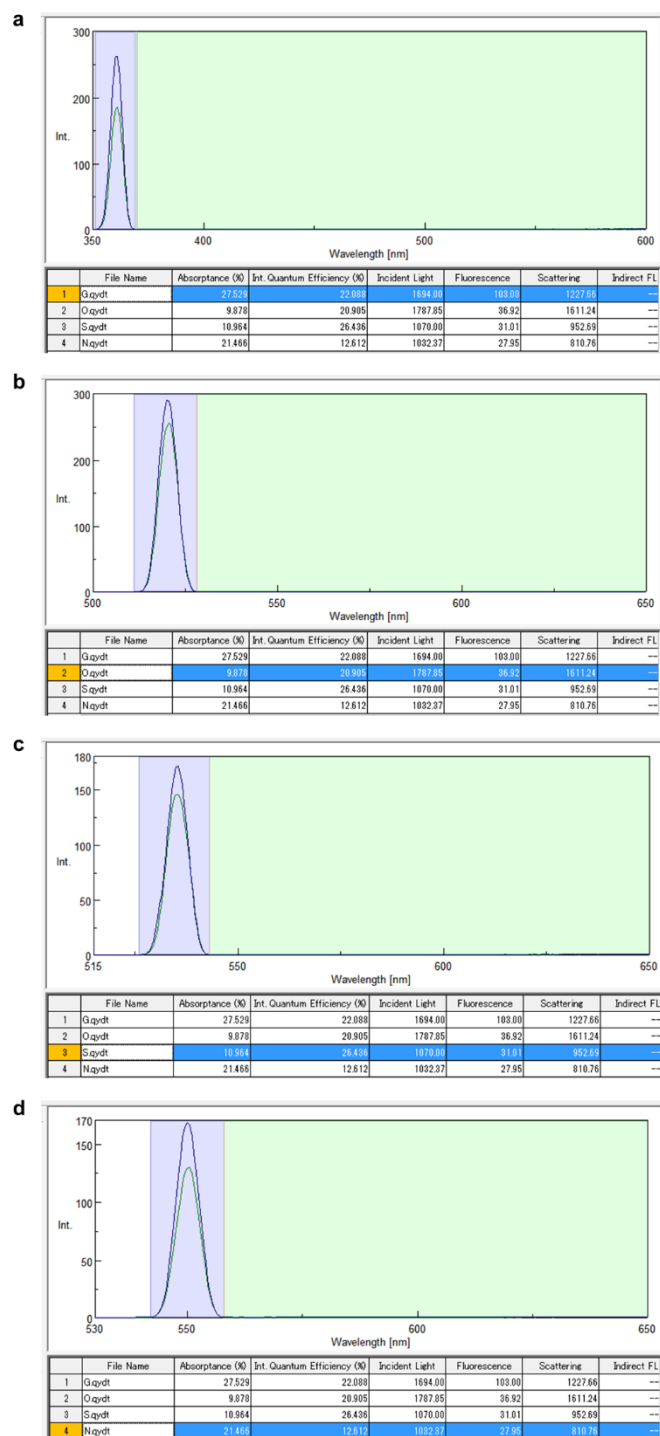

**Figure S20.** Quantum yield calculation of **f1** (a), **f2** (b), **f3** (c) and **f4** (d) by using Jasco Spectra Manager II Software.

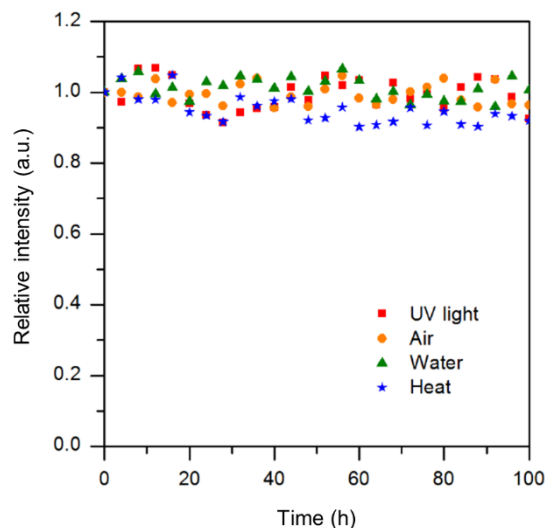

**Figure S21.** Long-term stability of light-converting films against UV light (360 nm), air, water and heat (80 °C). 360 nm UV lamps and digital hot plates were employed for exposing UV light and heat, respectively. For testing air-stability, the films were placed on silica gel under ambient conditions. For testing water-stability, the films were immersed in tap water at room temperature. In the experiments, the photoluminescence intensity of our films was recorded every 4 h on a Jasco FP-8500 fluorometer.

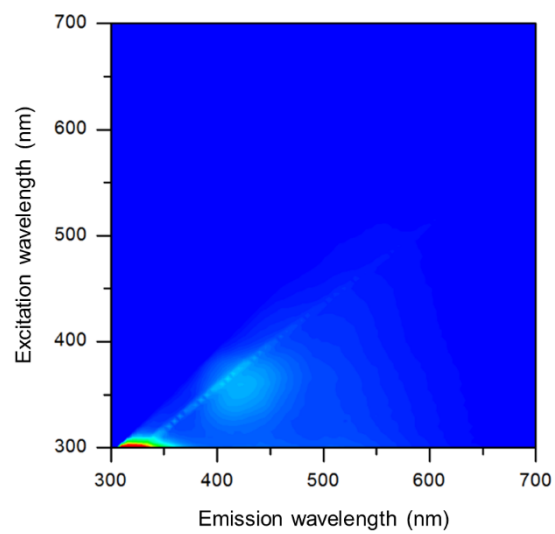

**Figure S22.** Emission map of C-dots functionalized with aniline (no substituent).

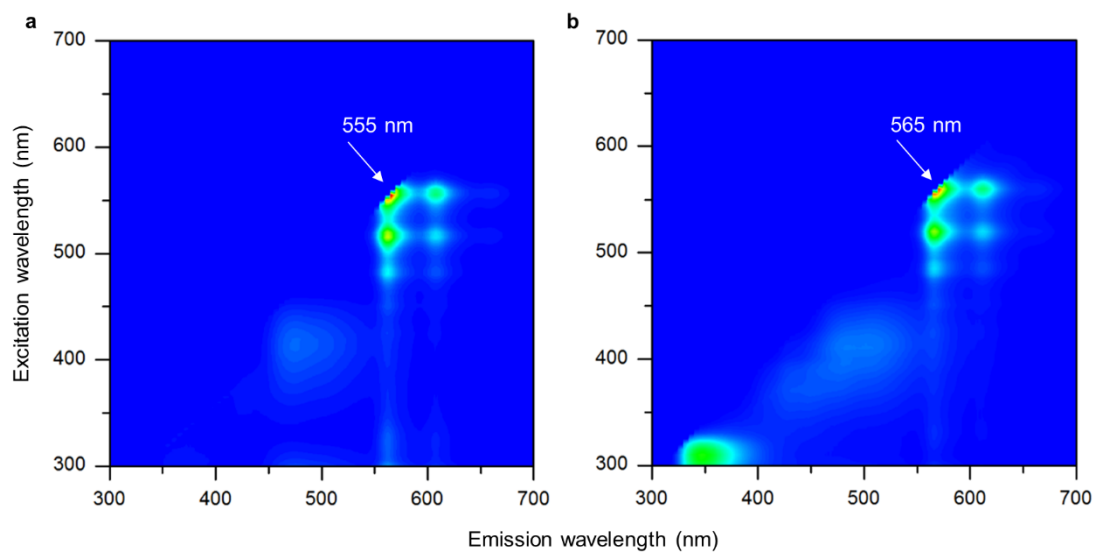

**Figure S23.** Emission maps of C-dots functionalized with 4-methoxyaniline (a) and 4-(octyloxy)aniline (b).

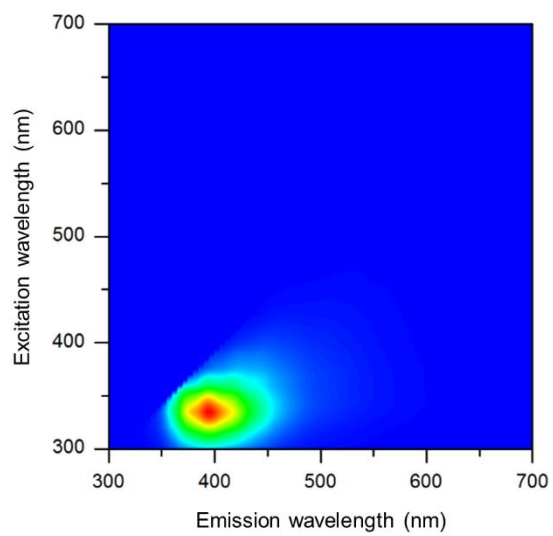

**Figure S24.** Emission map of C-dots functionalized with 4-methoxybenzylamine.

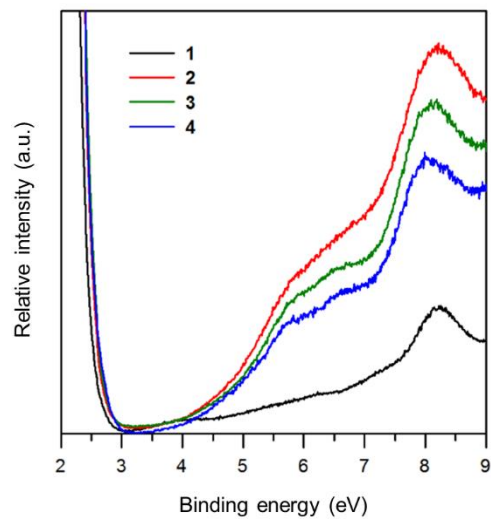

**Figure S25.** Electron energy loss spectroscopy data of C-dots deposited on gold-coated silicon substrates.

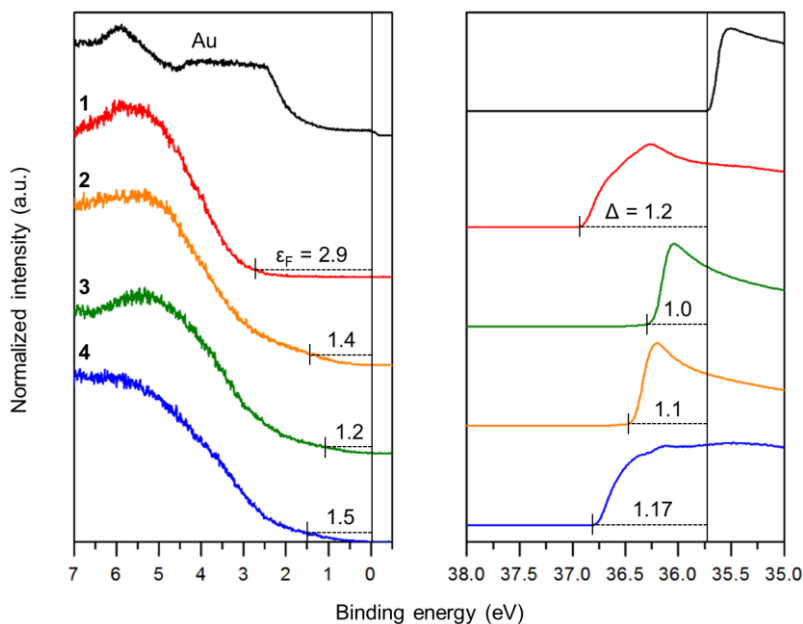

**Figure S26.** Ultraviolet photoelectron spectroscopy data of C-dots deposited on gold-coated silicon substrates.

Ishii and coworkers have suggested a mathematical method to extract the highest occupied molecular orbital (HOMO) level of organic semiconductor deposited on a metal film (typically Au) from ultraviolet photoelectron spectroscopy. The HOMO level ( $E_{\text{HOMO}}$ ) can be calculated by using the following equation:

$$E_{\text{HOMO}} = \varepsilon_{\text{F}} + \Phi_{\text{m}} - \Delta$$

, where  $\varepsilon_{\text{F}}$  is the difference between the Fermi edges of metal and organic semiconductor,  $\Phi_{\text{m}}$  is the work function of metal (5.1 eV for Au), and  $\Delta$  is the vacuum shift (the difference between the secondary cutoffs of metal and organic semiconductor). We note that  $\varepsilon_{\text{F}}$  and  $\Delta$  are due to higher electron-binding energy of organic semiconductor relative to metal and the presence of a dipole moment at the interface, respectively. The extracted HOMO levels of **1**, **2**, **3**, and **4** were then 6.8, 5.5, 5.2, and 5.4 eV, respectively.

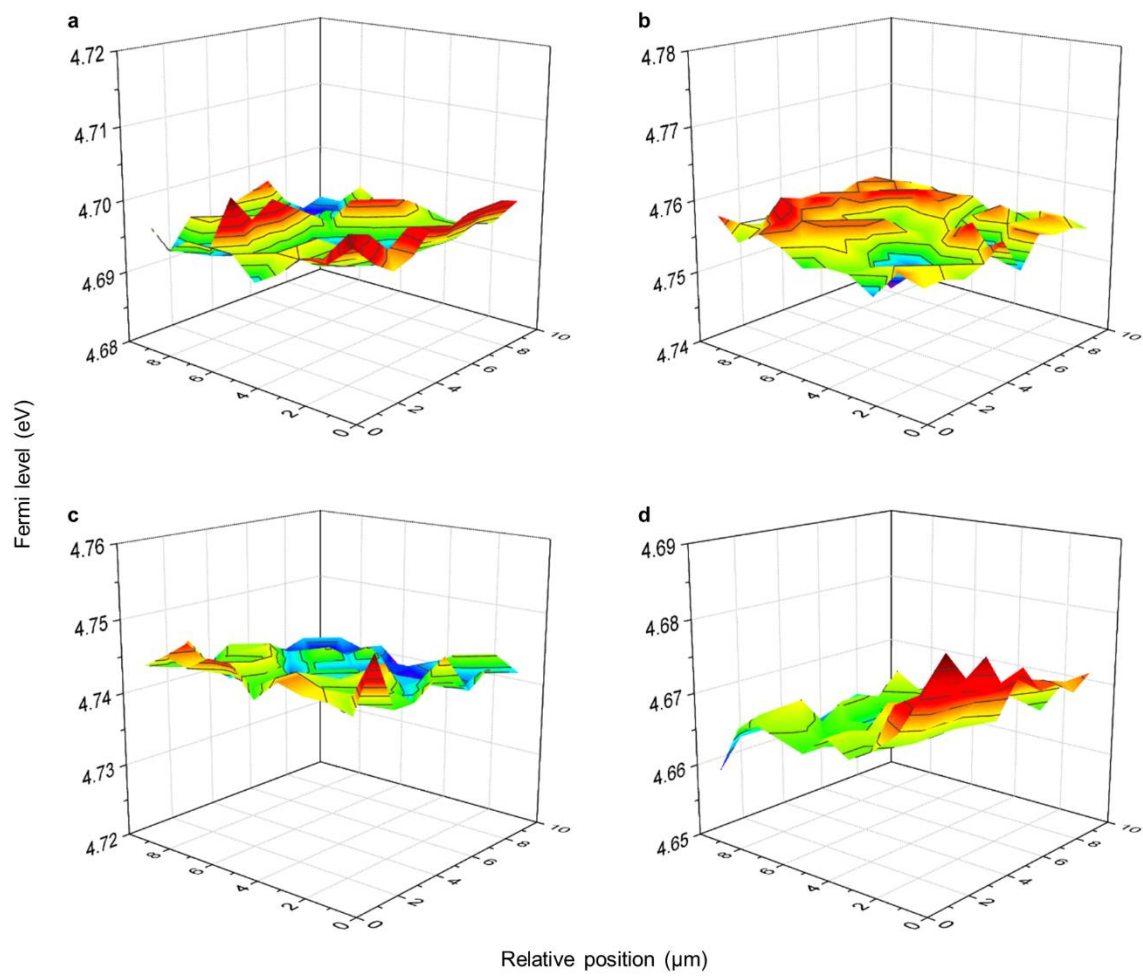

**Figure S27.** Kelvin probe analysis data of C-dots deposited on gold-coated silicon substrates.



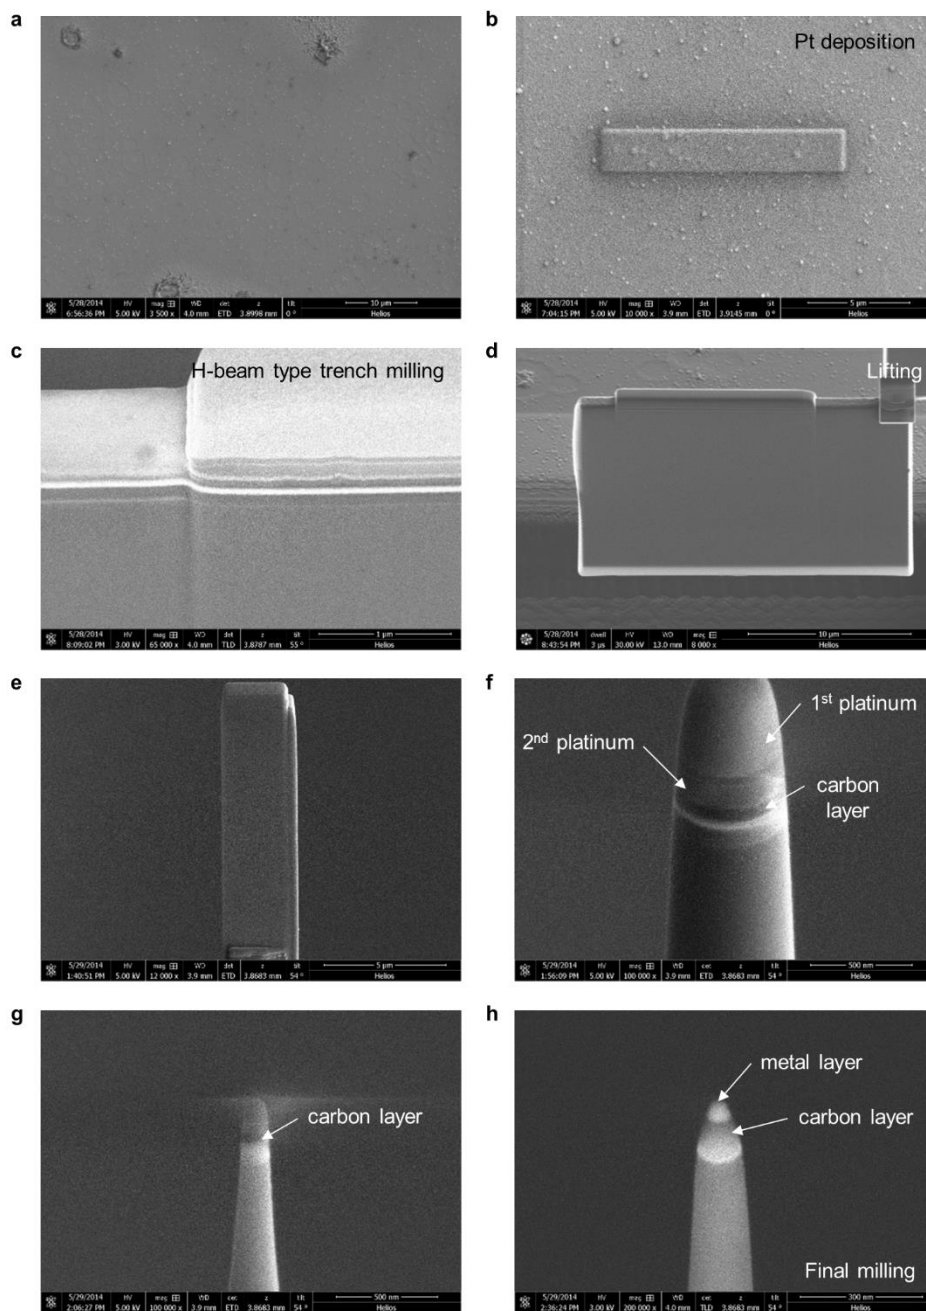

**Figure S28.** Preparation of atom probe specimens: scanning electron microscopy image of C-dots deposited on platinum substrates (a); platinum deposition (b); trench milling (c); lifting (d); side view of a lifted sample (e); step-by-step milling (f–h).
